# Supplementary material
Source: HighWire-hosted journal article supplement (https://bmjopen.bmj.com/content/13/7/e076716)
Supplement: inline-supplementary-material-1 [file inline-supplementary-material-1.pdf]

**Supplemental Table.** Illustration of 2x3 tables cross-classifying TVS and non-TVS outcomes by period

|                                                                                 |        | <b>Period 0</b>     | <b>Period 1</b>     | <b>Period 2</b>     | <b>Total</b>        |
|---------------------------------------------------------------------------------|--------|---------------------|---------------------|---------------------|---------------------|
| <b>Site 1 in pair <i>i</i></b><br><b>(exposed to D2S</b><br><b>in Period 1)</b> | TVS    | $X_{i10}$           | $X_{i11}$           | $X_{i12}$           | $X_{i1+}$           |
|                                                                                 | No TVS | $N_{i10} - X_{i10}$ | $N_{i11} - X_{i11}$ | $N_{i12} - X_{i12}$ | $N_{i1+} - X_{i1+}$ |
|                                                                                 | Total  | $N_{i10}$           | $N_{i11}$           | $N_{i12}$           | $N_{i1+}$           |
| <b>Site 2 in pair <i>i</i></b><br><b>(exposed to D2S</b><br><b>in Period 2)</b> | TVS    | $X_{i20}$           | $X_{i21}$           | $X_{i22}$           | $X_{i2+}$           |
|                                                                                 | No TVS | $N_{i20} - X_{i20}$ | $N_{i21} - X_{i21}$ | $N_{i22} - X_{i22}$ | $N_{i2+} - X_{i2+}$ |
|                                                                                 | Total  | $N_{i20}$           | $N_{i21}$           | $N_{i22}$           | $N_{i2+}$           |
| <b>Pair <i>i</i> totals</b>                                                     | TVS    | $X_{i+0}$           | $X_{i+1}$           | $X_{i+2}$           | $X_{i++}$           |
|                                                                                 | No TVS | $N_{i+0} - X_{i+0}$ | $N_{i+1} - X_{i+1}$ | $N_{i+2} - X_{i+2}$ | $N_{i++} - X_{i++}$ |
|                                                                                 | Total  | $N_{i+0}$           | $N_{i+1}$           | $N_{i+2}$           | $N_{i++}$           |

**Note:** Light grey cells represent the two 2x3 tables in site pair *i*. Dark grey cells represent the margins upon which the analysis will condition, whereas white cells represent the margins calculated by summing or subtracting other fixed margins.
